# Supplementary material for: Influence of applied electric fields on the positive magneto-LC effects observed in the ferroelectric liquid crystalline phase of a chiral nitroxide radical compound
Source: Royal Society of Chemistry journal article supplement (doi:10.1039/c3sm27295h), 2013-01-01
Supplement: c3sm27295h.pdf [file c3sm27295h.pdf]

## Influence of applied electric fields on the positive magneto-LC effects observed in the ferroelectric liquid crystalline phase of a chiral nitroxide radical compound

Katsuaki Suzuki, Yoshiaki Uchida, Rui Tamura,\* Yohei Noda, Naohiko Ikuma, Satoshi Shimono and Jun Yamauchi

### Supporting Information

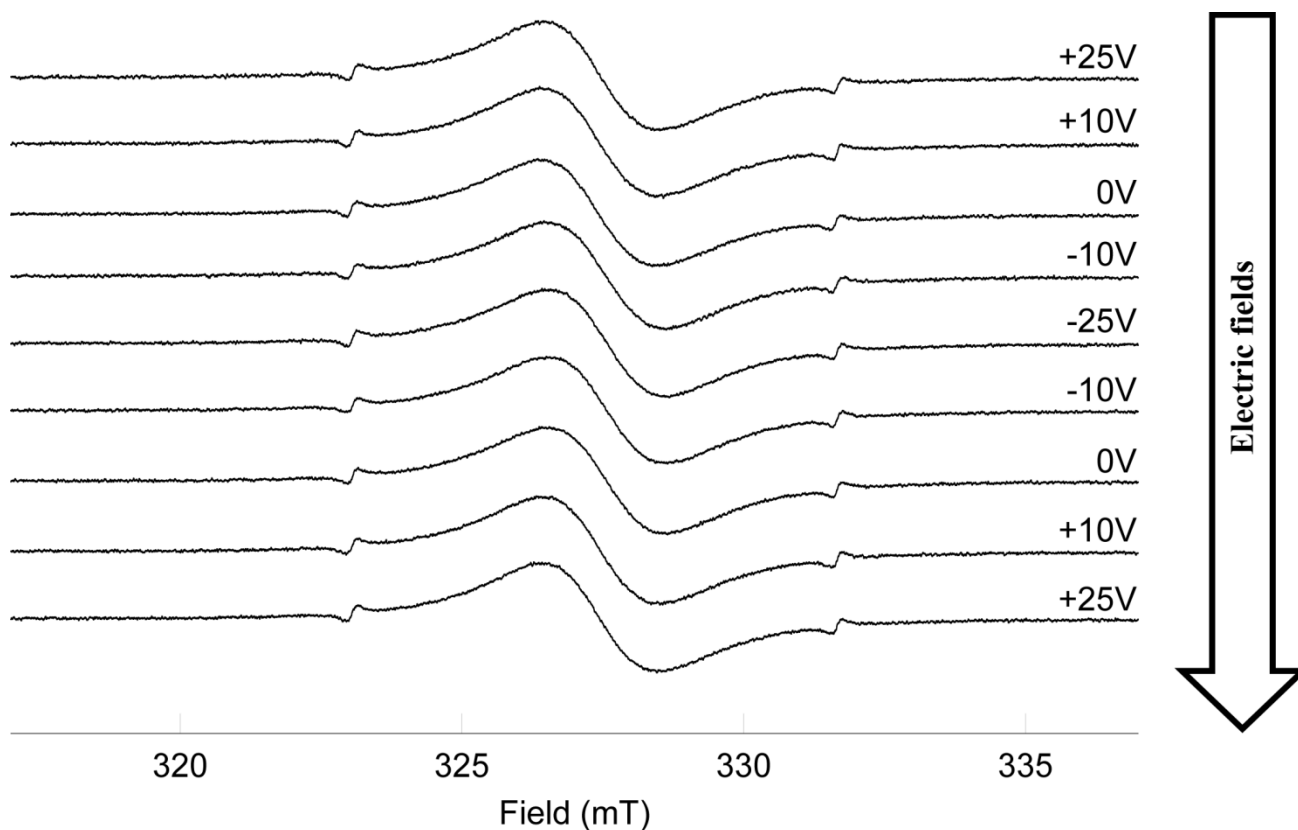

Figure S1. Selected EPR spectra of (2*S*,5*S*)-**1** measured at 75°C by application of electric fields, from +25V to -25V and then from -25V to +25V.

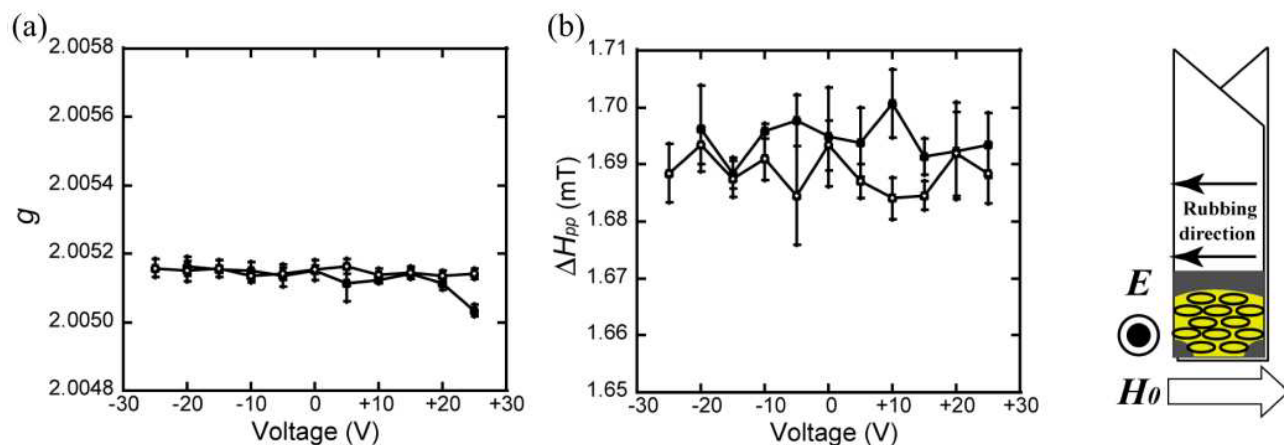

**Figure S2.** Electric field dependence of (a)  $g$  and (b)  $\Delta H_{pp}$  values of the achiral smectic C (SmC) phase of ( $\pm$ )-**1** confined in a thin rubbed sandwich cell (4  $\mu\text{m}$ -thickness) at 80°C by EPR spectroscopy; the magnetic field was applied perpendicular to the electric field and parallel to the rubbing direction. Open and filled circles represent the application of electric fields from +25V to -25V and from -25V to +25V, respectively.
